# Supplementary material for: Adaptive Metropolis-coupled MCMC for BEAST 2
Source: PeerJ journal article supplement (doi:10.7717/peerj.9473), 2020-09-16

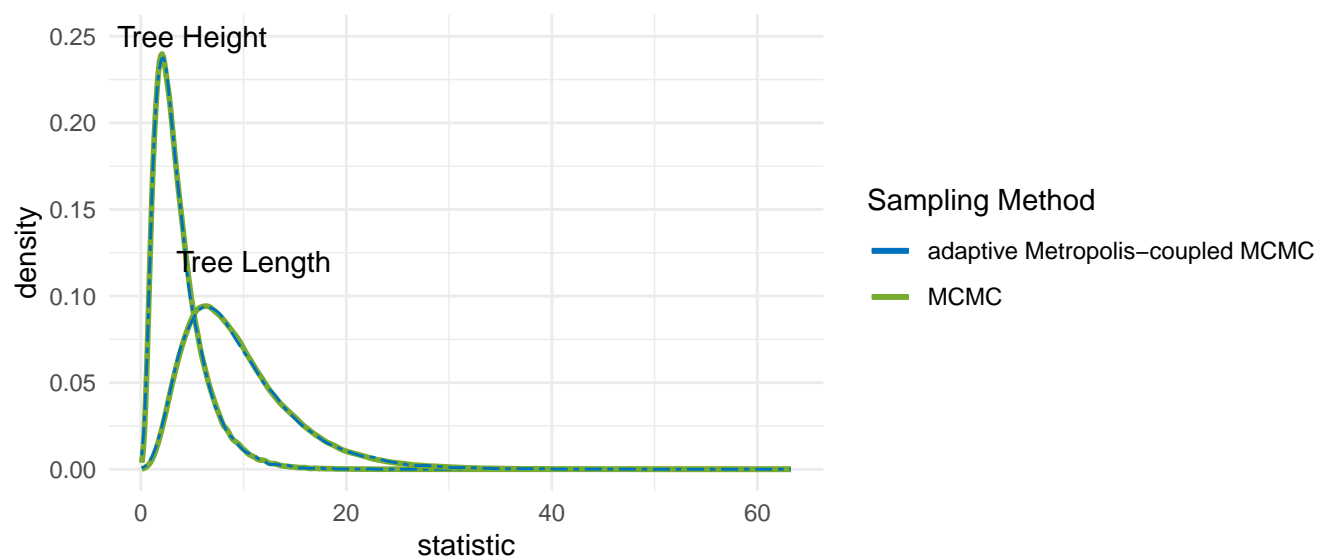

Supplement: FigS1.pdf [file FigS1.pdf]
