# Supplementary material for: Adaptive Metropolis-coupled MCMC for BEAST 2
Source: PeerJ journal article supplement (doi:10.7717/peerj.9473), 2020-09-16
Supplement: FigS3.pdf [file FigS3.pdf]

**A**

swap frequency = 100

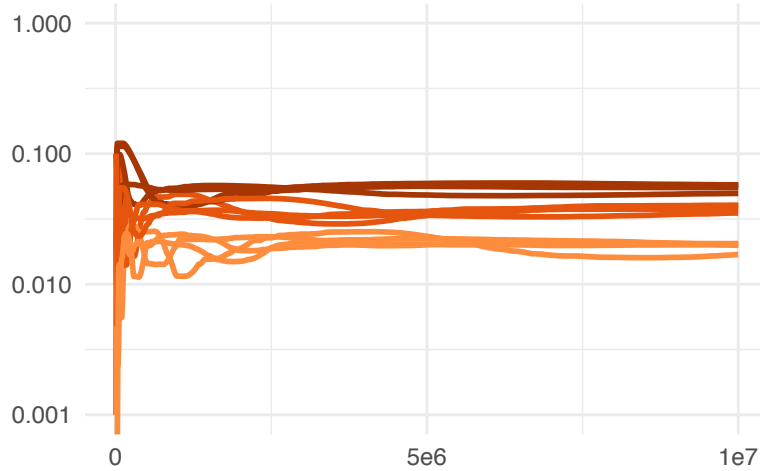**B**

swap frequency = 1000

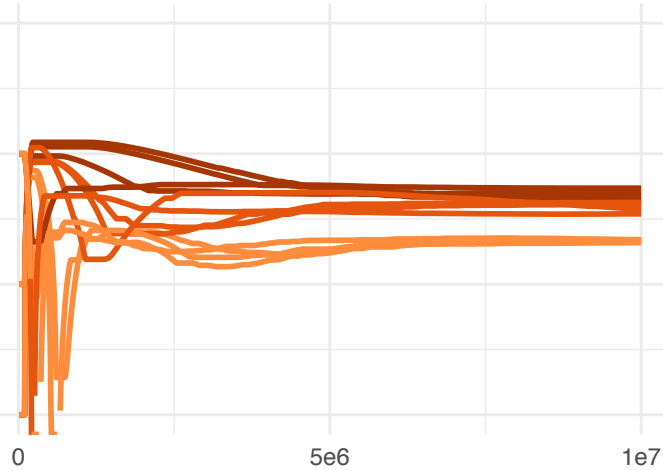target  
acceptance  
probability

— 0.117

— 0.234

— 0.468
